# Supplementary material for: Quantifying the range of the dust direct radiative effect due to source mineralogy uncertainty
Source: Copernicus journal article supplement (doi:10.5194/acp-21-3973-2021), 2021-03-17
Supplement: Supplementary file 1 [file acp-21-3973-2021-supplement.zip]

Archive with 2 entries (2 files):
- acp-21-3973-2021-supplement-title-page.pdf
- lli_DRF_Uncertainty_Supplement_ACCEPTED.docx
