# Supplementary material for: Quantifying the range of the dust direct radiative effect due to source mineralogy uncertainty
Source: Copernicus journal article supplement (doi:10.5194/acp-21-3973-2021), 2021-03-17
Supplement: Supplementary file 1 [file acp-21-3973-2021-supplement.zip › acp-21-3973-2021-supplement-title-page.pdf]

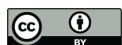

*Supplement of*

## **Quantifying the range of the dust direct radiative effect due to source mineralogy uncertainty**

**Longlei Li et al.**

*Correspondence to:* Longlei Li (ll859@cornell.edu)

- [acp-21-3973-2021-supplement-title-page.pdf](#)
- [lli\\_DRF\\_Uncertainty\\_Supplement\\_ACCEPTED.docx](#)

The copyright of individual parts of the supplement might differ from the article licence.
